# Supplementary material for: Aspergillus Sensitization and Allergic Bronchopulmonary Aspergillosis in Asthmatic Children: A Systematic Review and Meta-Analysis
Source: MDPI journal article supplement (doi:10.3390/diagnostics13050922), 2023-03-01

**Table S1:** Newcastle Ottawa score to assess the quality of the studies included in the systematic review of literature and meta-analysis

| Reference                      | Selection (max 5)      |                 |                     |                           |                   |                        |                      | Overall score |
|--------------------------------|------------------------|-----------------|---------------------|---------------------------|-------------------|------------------------|----------------------|---------------|
| Study                          | Representativeness (1) | Sample size (1) | Non-respondents (1) | Ascertaining exposure (2) | Comparability (2) | Outcome Assessment (2) | Statistical test (1) |               |
| Hoehne JH, et al. (1973)[39]   |                        | *               | *                   | **                        | *                 | **                     | *                    | 8             |
| Chetty A, et al. (1985)[40]    | *                      |                 | *                   | **                        | **                | **                     | *                    | 9             |
| Koivikko A, et al. (1991)[41]  | *                      | *               | *                   | **                        | *                 | **                     | *                    | 9             |
| Korhonen K, et al. (2006)[42]  | *                      | *               | *                   | **                        | *                 | **                     | *                    | 9             |
| Knutsen AP, et al. (2010)[43]  | *                      | *               | *                   | **                        | *                 | **                     | *                    | 9             |
| Nabavi M, et al. (2010)[44]    | *                      | *               | *                   | **                        | *                 | **                     | *                    | 9             |
| Arroyave WD, et al. (2013)[45] | *                      | *               | *                   | **                        | **                | **                     | *                    | 10            |
| Vicencio AG, et al. (2014)[46] | *                      | *               | *                   | **                        | *                 | **                     | *                    | 9             |
| Singh M, et al. (2015)[47]     |                        | *               | *                   | **                        | *                 | **                     | *                    | 8             |
| AlKhater SA, et al. (2017)[48] | *                      | *               | *                   | *                         | *                 | **                     | *                    | 8             |
| Byeon JH, et al. (2017)[49]    | *                      | *               | *                   | **                        | *                 | **                     | *                    | 9             |
| Lehmann S, et al. (2017)[50]   | *                      | *               | *                   | **                        | *                 | **                     | *                    | 9             |
| Gupta A, et al. (2018)[51]     | *                      | *               | *                   | *                         | *                 | **                     | *                    | 8             |
| Ishak SR, et al. (2020)[52]    | *                      |                 | *                   | **                        | *                 | **                     | *                    | 8             |
| Kumari J, et al. (2020)[53]    |                        | *               | *                   | **                        | **                | **                     | *                    | 9             |
| Welsh KG, et al. (2021)[9]     | *                      | *               | *                   | *                         | *                 | **                     | *                    | 8             |

\*Indicates the score assigned. A maximum of five, two, and three are possible for the 'selection', 'comparability' and the 'outcome' domains, respectively.  
- indicates no score assigned

Figure S1: Funnel plot for the outcome of allergic bronchopulmonary aspergillosis in asthmatic children

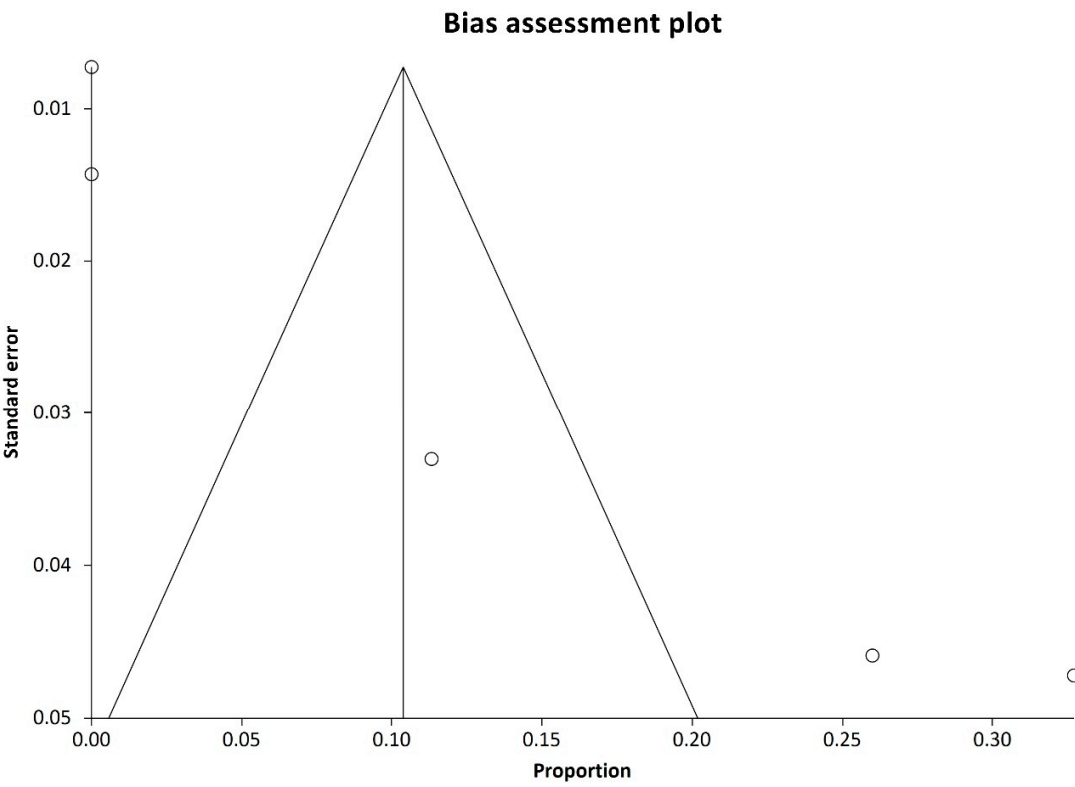

Supplement: s1 [file s1]
